# Supplementary material for: Novel biomarkers for glycaemic deterioration in type 2 diabetes: an IMI RHAPSODY study
Source: bioRxiv or medRxiv preprint supplement (doi:10.1101/2021.04.22.21255625), 2021-04-24
Supplement: Supplementary file [file media-1.pdf]

**a**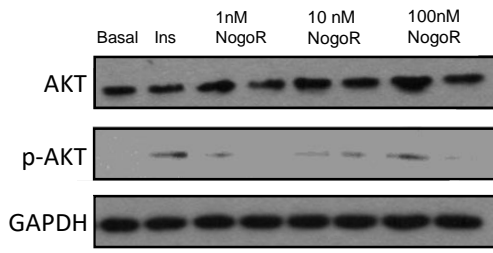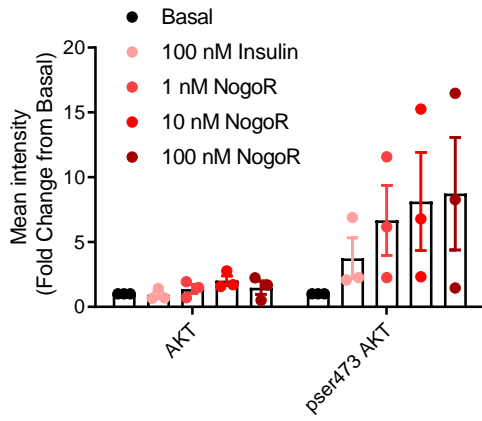**b**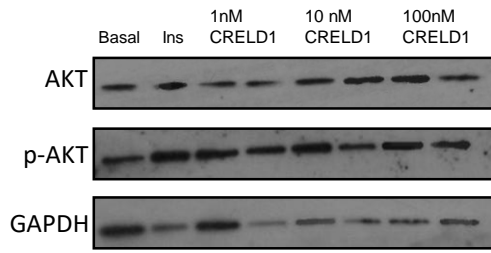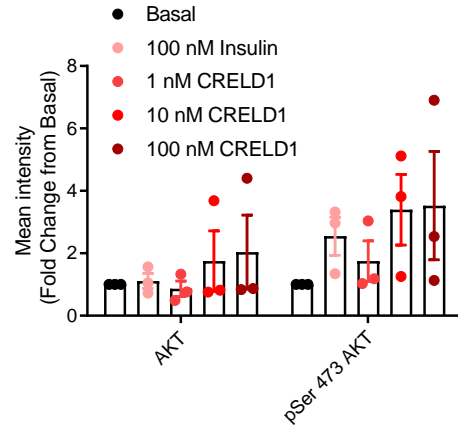

Supp. Fig. 1
